# Supplementary material
Source: Springer Nature journal article supplement (https://www.springermedizin.de/resource/supplementary/13049_2013_729_MOESM4_ESM.pdf/9667238)
Supplement: MOESM4 [file 9667238]

# EMS background

|   |                                                                                                                                                                                                                                                                                                                                                                                                                                                                                                                                                                                                                                                                                     |
|---|-------------------------------------------------------------------------------------------------------------------------------------------------------------------------------------------------------------------------------------------------------------------------------------------------------------------------------------------------------------------------------------------------------------------------------------------------------------------------------------------------------------------------------------------------------------------------------------------------------------------------------------------------------------------------------------|
| 1 | <p><b>Was an EMS coordinating centre (the centre responsible for dispatching and coordinating EMS units on-scene) available in the affected country/ies before the incident?</b></p> <p><input type="radio"/> Yes<br/><input type="radio"/> No</p>                                                                                                                                                                                                                                                                                                                                                                                                                                  |
| 2 | <p><b>Does a dialling number to Emergency Services exist?</b></p> <p><input type="radio"/> Yes<br/><input type="radio"/> No</p> <p><i>If yes: a single and unique dialling number to EMS or one common dialling number for all Emergency Services (fire, police and EMS)?<br/>If no: please specify how EMS is alerted.</i></p>                                                                                                                                                                                                                                                                                                                                                     |
| 3 | <p><b>Can a major incident be declared directly by the person receiving an alert at the EMS coordinating centre?</b></p> <p><input type="radio"/> Yes<br/><input type="radio"/> No<br/><input type="radio"/> Unknown</p>                                                                                                                                                                                                                                                                                                                                                                                                                                                            |
| 4 | <p><b>What is the background of staff in the every-day/normal staffing of EMS services? Please tick for all options that apply.</b></p> <p><input type="checkbox"/> Basic Life Support by non-EMS professional<br/><input type="checkbox"/> Basic Life Support by EMS professionals, non-physician<br/><input type="checkbox"/> Advanced Life Support by EMS professional, non-physician<br/><input type="checkbox"/> Advanced Life Support on-scene by physician<br/><input type="checkbox"/> Other/unknown</p> <p><i>If other please specify.</i></p>                                                                                                                             |
| 5 | <p><b>What other resources are routinely available to assist the EMS service in a normal setting? Please tick for all options that apply.</b></p> <p><input type="checkbox"/> Fire brigade<br/><input type="checkbox"/> Police<br/><input type="checkbox"/> Voluntary organizations.<br/><input type="checkbox"/> Coast guard<br/><input type="checkbox"/> Military<br/><input type="checkbox"/> Civil protection<br/><input type="checkbox"/> Other/unknown</p> <p><i>If other please specify.<br/>If voluntary organizations are available please specify which and if these require authorisation from police or other authorities to participate in the response phase.</i></p> |
| 6 | <p><b>What other resources can be mobilized in a major incident? Please tick for all options that apply.</b></p> <p><input type="checkbox"/> Fire brigade<br/><input type="checkbox"/> Police<br/><input type="checkbox"/> Voluntary organizations<br/><input type="checkbox"/> Coast guard<br/><input type="checkbox"/> Military<br/><input type="checkbox"/> Civil protection<br/><input type="checkbox"/> Other/unknown</p> <p><i>If other please specify.<br/>If voluntary organizations are available please specify which and if these require authorisation from police or other authorities to participate in the response phase.</i></p>                                   |
| 7 | <p><b>How many and what type of hospitals exist within the EMS catchment system that was affected by the major incident? Please tick for all options that apply.</b></p> <p><input type="checkbox"/> Regional hospital with trauma specialty<br/><input type="checkbox"/> Regional hospital without trauma specialty<br/><input type="checkbox"/> Local hospital without trauma specialty<br/><input type="checkbox"/> Other types of hospitals. Please specify</p> <p><i>Please state whether the numbers are estimated or exact.</i></p>                                                                                                                                          |
| 8 | <p><b>Is a pre-hospital on-scene triage system in use daily on a national level?</b></p> <p><input type="radio"/> Yes<br/><input type="radio"/> No<br/><input type="radio"/> Unknown</p> <p><i>If yes please specify which triage system/s.</i></p> <p><b>Is a pre-hospital on-scene triage system in use daily on regional levels?</b></p> <p><input type="radio"/> Yes<br/><input type="radio"/> Yes, but different triage systems exist in different regions<br/><input type="radio"/> No<br/><input type="radio"/> Unknown</p> <p><i>If yes please specify which triage system/s.</i></p>                                                                                       |

|    |                                                                                                                                                                                                                                                                                                                                                                                                                                                                                                                                                                                                                                |
|----|--------------------------------------------------------------------------------------------------------------------------------------------------------------------------------------------------------------------------------------------------------------------------------------------------------------------------------------------------------------------------------------------------------------------------------------------------------------------------------------------------------------------------------------------------------------------------------------------------------------------------------|
| 9  | <p><b>Is a pre-hospital on-scene triage system for major incidents in use on a national level?</b></p> <p><input type="radio"/> Yes<br/> <input type="radio"/> No<br/> <input type="radio"/> Unknown</p> <p><i>If yes please specify which triage system/s.</i></p> <p><b>Is a pre-hospital on-scene triage system for major incidents in use on regional levels?</b></p> <p><input type="radio"/> Yes<br/> <input type="radio"/> Yes, but different triage systems exist in different regions<br/> <input type="radio"/> No<br/> <input type="radio"/> Unknown</p> <p><i>If yes please specify which triage system/s.</i></p> |
| 10 | <p><b>Does the pre-hospital on-scene triage system for major incidents include direct tagging/labelling of patients?</b></p> <p><input type="radio"/> Yes<br/> <input type="radio"/> No<br/> <input type="radio"/> Unknown<br/> <input type="radio"/> N/A</p>                                                                                                                                                                                                                                                                                                                                                                  |
| 11 | <p><b>For those employees within the pre-hospital EMS system who are intended to work on-scene: is major incident training mandatory?</b></p> <p><input type="radio"/> Yes<br/> <input type="radio"/> No<br/> <input type="radio"/> Unknown</p>                                                                                                                                                                                                                                                                                                                                                                                |
